# Supplementary material for: A First NGS Investigation Suggests No Association Between Viruses and Canine Cancers
Source: Front Vet Sci. 2020 Jul 17;7:365. doi: 10.3389/fvets.2020.00365 (PMC7380080; doi:10.3389/fvets.2020.00365)
Supplement: Supplementary file 3 [file Table_3.xlsx]

## Sheet: Table S3
Disease	Sample ID	Virus name	Identities (%)	Contig length (bp)	#Reads fallen on contigs	Trinity reference	Contig sequence	E-value Blast other organisms	Organism
Lymphoma	SAMN03436563	U86599_Pestivirus_type_1_cytopathic_genomic_RNA	95.833	397	14533	TRINITY_DN320_c0_g1_i1	GGTAAGACCATCACCCTGGAGGTGGAGCCCAGTGACACCATCGAGAACGTCAAGGCGAAGATCCAGGACTGGAGTTCAGACGTGTGCTCTTCCGATCTTGTCCGACTACAACATCCAGAAGGAGTCCACTCTGCACCTGGTCCTTCGCCTCAGGGGGGGCATGCAGATCTTCGTGAAGACCTTGACGGGTAAGACCATCACCCTGGAGGTGGAGCCCAGTGACACCATCGAGAACGTCAAGGCGAAGATCCAGGACTGGAGTTCAGACGTGTGCTCTTCCGATCTTGTCCGACTACAACATCCAGAAGGAGTCCACTCTGCACCTGGTCCTTCGCCTCAGGGGGGGCATGCAGATCTTCGTGAAGACCTTGACGGGTAAGACCATCACCCTGGAGGT	NA
Mast Cell Tumor	SRR8510331	U86599_Pestivirus_type_1_cytopathic_genomic_RNA	96.364	254	15281	TRINITY_DN1384_c0_g1_i2	CCCCCCCCCCCCCCCCCCCCCCCTTTTTTTTTTCAAGCAGAAGACGGCATACGAGATCGGGACGGGTGACTGGAGTTCAGACGTGTGCTCTTCCGATCTCTCACCTCCAGGGTGATGGTCTTGCCGGTCAGGGTCTTCACGAAGATCTGCATACCACCCCTCAGGCGCAGGACCAGGTGCAGGGTTGACTCTAGATCGGAAGAGCGTCGTGTAGGGAAAGAGTGTAGATCTCGGTGGTCGCCGTATCATTAAAA	NA
Mast Cell Tumor	SRR8510336	U86599_Pestivirus_type_1_cytopathic_genomic_RNA	93.827	261	21995	TRINITY_DN23803_c0_g1_i1	CCCCCCCCCCGCCCCCCCCCCCCCCCCCCCCCCCACATTTTTTTTAATGATACGGCGCCCACCTAGATCTACCGTCTTTCCCTCCACGACGCTCTTCGGATCTTGGAGGTGGAGCCCAGTGACACCATCGAGAACGTCAAGGCGAAGATCCAGGACAAGGAGGGCATCCCCCCTGACCAGCAGACGATCCGAAGAGCCCCCGTCGCCCCTGCAGAGCCCCGGCCCGAGGGCGTCTGCCCCCTGCTGCATGAGAAAACACTG	NA
Mast Cell Tumor	SRR8510343	U86599_Pestivirus_type_1_cytopathic_genomic_RNA	95.556	299	3519	TRINITY_DN657_c0_g2_i2	CCCCCCCCCCCCCATTTTTTTTTAATGATACGGCGACCACCGAGATCTACACTCTTTCCCTACACGACGCTCTTCCGATCTAGTCAACTCTCCACCTGGTCCTGCGCCTGAGGGGTGGTATGCAGATCTTCGTGAAGACCCTGACCGGCAAGACCATCACCCTGGAGGTGGAGCCCAGTGACACCATCGAAAATGTGAAGGCCAAGATCGGAAGAGCACACGTCTGAAATCCAGTCACGTCCGCACAGCTCGTCTGCCCTCGTCTGCTTGTAAAAAAAAAGGGGGGCGGGGGGGGGGGG	NA
Mast Cell Tumor	SRR8510356	U86599_Pestivirus_type_1_cytopathic_genomic_RNA	92.857	252	1501	TRINITY_DN6554_c0_g1_i1	CCCCCCCCCCCCCCCCCCCCCCCCCCCCCCCCCCTTCTTATGTCACTGCTACGCCGCCCACCGCGCTCTCCCCTCTTCCCCAACACGACGCTCTTCCGAGCTGGAGGTGGAGCCCAGTGACACCATCGAGAACGTCAAGGCGAAGATCCAGGACAAGTAGGGCATCCCCCCTGACCAGCAGAGGTAATAGGAAGAGCTCACGTATCTGGTGCAGGCTCGAGCGGATGGCGTTTGCCGCCTACTGCTTTAAAC	NA
Mast Cell Tumor	SRR8510365	U86599_Pestivirus_type_1_cytopathic_genomic_RNA	93.458	271	14206	TRINITY_DN523_c0_g1_i1	CCCCCCCCCCCCCCCCCCCCCCCCCCCCCTTTTTTTTTTAATGATACGGCGACCACCGAGATCTACACTCTTTCCCTACACGACGCTCTTCCGATCTCCTTGACGGGTAAGACCATCACCCTGGAGGTGGAGCCCAGTGACACCATCGAGAACGTCAAGGCGAAGATCCAGGACAAGGAGGGCATCCCCCCTGACCAGCAGAGGAGATCGGAAGAGCACACGTCTGAACTCCAGTCACGTCCGCACATCTCGTATGCCGTCTTCTGCTTGA	NA
Mast Cell Tumor	SRR8510366	NC_003678__Pestivirus_Giraffe-1	92.473	266	25923	TRINITY_DN613_c0_g1_i1	GCATACGAGATCGGGACGGGTGACTGGAGTTCAGACGTGTGCTCTTCCGATCTGGGCATCTGGGGTTGTTCTCTGCCGCCCACTGGTGCCTGGAATCCGAGAACCAAATGAGATGTGATAGGGGACTCTGTGGGTATCTGGGGAGATTCCCACACACTGGCATCCAGCCCATTCTAGATCGGAAGAGCGTCGTGTAGGGAAAGAGTGTAGATCTCGGTGGTCGCCGTATCATTAAAAAAAAAAGGGGGGGGGGGGGGGGGGGGGGG	NA
Mast Cell Tumor	SRR8510385	U86599_Pestivirus_type_1_cytopathic_genomic_RNA	94.34	299	13962	TRINITY_DN2604_c0_g1_i3	CCCCCCCCCCCCCCCCCCCCCCCTTTTTTTTTTAATGATACGGCGACCACCGAGATCTACACTCTTTCCCTACACGACGCTCTTCCGATCTGTCCTGCGCCTGAGGGGTGGTATGCAGATCTTCGTGAAGACCCTGACCGGCAAGACCATCACCCTGGAGGTGGAGCCCAGTGACACCATCGAAAATGTGAAGGCCAAGATCCAGGATAAAGAGGGCAAGATCGGAAGAGCGTCGTGTAGGGAAAGAGTGTAGATCTCGGTGGTCGCCGTATCATTAAAAAAAAAAGGGGGGGGGGGGG	NA
Osteosarcoma	SRR8691712	NC_001716__Human_herpesvirus_7	94.286	249	1437	TRINITY_DN8280_c0_g1_i2	TAAACCTAAACCTAAGCTGTACCCTAACCCTAACCCTAACCCAAACCCGTACCCTTACTCTAACACGAAATCTCCCGTATCCTAACCCTAACACGTACCCTAACCCTAACCCTAATCCGTACGCTAACCCGTACCGTAATCCTAAACCTAACCCGTACCCTAAACCTAACCATAAACCCAAACCTAACCTGAACCCTAACTCTAACCTGTACCCTAACCCTAAACCGTAACCTAACCTGTACCCTAACC	3e-14	Branchiostoma floridae
Osteosarcoma	SRR8691714	L11456_Human_T-cell_lymphotropic_virus_type_II	100	1239	19891	TRINITY_DN2655_c0_g1_i1	CAGGTGCGCACATTAACAACTGAACTATCGAGGCTATCGCGGCATTTCCGCTTGCATCAGCTGCAGGAGGCGTGGCGGCTCGTTGGTCTAGGGGTATGATTCTCGCTTTGGGTGCGAGAGGTCCCGGGTTCAAATCCCGGACGAGCCCCAGGTTTTGCTTTTTCATCCTCCCTCGGAAACAACGCACAAGTGCGGTTCGCGGCAAACTTTCTCGCTCCCGAGTGTCCTGCCGCCCGCTCCCGGGCCCCGCGCTCCCAGGCCGTGCCCCTCGGCCTCGTCCCCCCGGCCGCCCCGCCTGCCCCTCGGTCTGCCGCCCGCCCCGCCCGGCCCGCGGCGCCCACCCCGGAGGCAGGTCCGGGCGGGAGGGCTCCCGGGGAGGAACAGGGCGCCGCCCTCCAC…	NA
Osteosarcoma	SRR8691723	NC_001716_Human_herpesvirus_7	86.792	765	6412	TRINITY_DN6247_c0_g1_i4	GTGGCCTGAGGACCCTGCTCCTGCCCCCCGCCCCCCTCCTGTGGTCTGTCCTGTCGGCTGGTCCCAAGCGGGGCTCCGTATCCCCGATGCCTGGGGCCTTGCAAGCGACCCAGGTGAGCCGGGGTAGGTGGCCTGAGGACCCTGCCCCCCCCCCCCCCCGTGATCTGTCCTATCAGTTGGTCCCACATCCCCGATGCCCGGGGCCTTGCAAGCGACCCAGGTGAGCCGGGGCAGGTGGCCTGTAGGTGGCCTGAGGACCCTGCCCCCCCCCCCCCCCGTGATCTGTCCTATCAGTTGGTCCCACATCCCCGATGCCCGGGGCCTTGCAAGCGACCCAGGTAGGACCCTGCTCCTGCCCCCCACCCCTCCTGTGATCTGTCCAGTCCGCTGGTCCTGAGC…	NA
Osteosarcoma	SRR8691727	NC_002641_Meleagrid_herpesvirus_1	94.286	287	71498	TRINITY_DN2042_c0_g1_i1	CTAACCCTAACCCTAACCCTAACCCTAACCCTAACCCTAACCCTAACCCTAACCCTAACCCTAACCAGATCGGAAGAGCACACGTCTGAACTCCAGTCACCATGCTTAATCTCGTATGCCGTCTTCTGCTTGAAAAAACTAACCCTAACCCTAACCCTAACCCTAACCAGATCGGAAGAGCACACGTCTGAACTCCAGTCACCATGCTTAATCACGTATGCCGTCTTCTGCTTGAAAAAACTAACCCTAACCCTAACCCTAACCCTAACCCTAACCCTAACCCTAAC	9.3	Branchiostoma floridae
Osteosarcoma	SRR8691742	NC_001716_Human_herpesvirus_7	94.595	257	161694	TRINITY_DN175_c0_g1_i8	CCCTAACCCTAACCCTAACCCTACCCCTAACCCTAACCCTAACCCGTAAACTAAACCTAACCCTAACCCTATCCCTAAATAGTACCCTAACCCTAACCCTAACCCGTTCCCTAACCCTAACCCTAACCCTAAAGATCGGAAGAGCACACGTCTGAACTCCAGTCACTTCGCTGAATCTCGTATGCCGTCTTCTGCTTGAAAAAACCCTAACCCTAACCCTAACCCAAACCCATACCCTAACTCTAACTCTCCTGTAC	8e-09	Branchiostoma floridae
Osteosarcoma	SRR8691744	NC_007646_Ovine_herpesvirus_2	100	230	35764	TRINITY_DN105107_c2_g1_i1	TAGGGTTAGGGTTAGGGTTAGGGTTAGGGAGATCGGAAGAGCGTCGTGTAGGGAAAGAGTGTAATACCAGGTGTAGATCTCGGTGGTCGCCGGATCATTAAAAAAGGTTAGGGGGAGGGGGAGGGGGAGGGGGCGGGGGACGGAGGGACGGCCCGGAGGGGGCGCGGTGGGGGCAGGACGGGCCCCACCGGGAGGCCCGGGGCGGGACTCAGGAGGAGAAAACAGTGTAT	NA
Osteosarcoma	SRR8691748	NC_007646_Ovine_herpesvirus_2	100	391	5458	TRINITY_DN194068_c0_g1_i1	TTAGGGTTAGGGTTAGGGTTAGGGTTAGGGTTAGGGTTAGGGTTAGGGTTAGGGTTAGGGTTAGGGTTAGGGTTAGGGTTAGGTTTTCTTTAGTTCCTATAAGAAAGAAGCAAAAAAATGGAGAAAGGTCAGAAAGATTGGCAACATAAAGCTCTTGGCAATGTGAGCCACAGGCAACTTGAAGACAGTCACAGGGAATTAAAATTTAGAGGGACCTCATGGAGCTGAAAGTCGGACCTCTGAGGAAGGATGCTGGTGCTGCTGGTGGCCCTGAGACCTAGATCCCCGCAGTCACGCTAGCGTCTCACGACATGATCAAAGCAGTTCCGTAGGTGTTGTGAAAACTGCAACTGTGTTCAGTTCCTAACCCTAACCCTAACCCTAACCCTAA	0.0006	Macrostomum lignano
Osteosarcoma	SRR8691785	NC_002577_Gallid_herpesvirus_3	92.793	210	54162	TRINITY_DN97337_c0_g2_i1	CCTAACCCTAACCCTAACCCTAACCCTAACCCTAACCCTAACCCTAACCCTAACCCTAACCCTAACCCTAACACTAACCCTAGCCCTAACCCGAACCCTAACCCTAAATTTTTTCAAGCAGAAGACGGCATACGTGATCCTAGAATGTGACTGGAGTTCAGACGTGTGCTCTTCCGATCTCCTAACCCTAACCCTAACCCTAACCCTAAC	2e-07	Branchiostoma floridae
Osteosarcoma	SRR8691786	NC_001716_Human_herpesvirus_7	96.97	352	5727	TRINITY_DN68124_c0_g1_i1	GGGTTAGGGTTAGGGTTAGGGTTGGGGTTAGGATTAGGGATTAGGGGTTAGGGTTTGATTTATGGTTAAGATTTAGCATTATGATTAGTGTTTAGTTTTAGGGTAGTGGTTAAAGTTAGTGTTAGAATTTAGTGTTAATGTTAGGGTTAAGGTTAGGGTTAAGTTTAAGATAGATTTAGGATTATGCTTATGGGTTATCATTAGGGTTAATCTTAGTGTTACTTTTAGGGTTATGGTTAGGGGTAGGGGTAGGGTTAGTGTTTGGAGCAGGAGACGGCTTACGGGATGTTCATTGGTTACGGGAGTGCAGAGGTTTGCTGTTACGGTTTGGGTTAGGGTTAGGGTTAGGGTT	2e-12	Macrostomum lignano
Osteosarcoma	SRR8691791	NC_001847_Bovine_herpesvirus_1	94.286	611	5682	TRINITY_DN4753_c0_g1_i1	CCGGGGCGGGGCGGGGCCGGGCGGGCGGCTCTCCGGCGCCGCGGGCGGTGGGACGCGGCCGGGGACTGCGCCGGGCCGCCGGTTCCCACCCAGCCTGCTCATTTTTGCGGTGCGGATGGACCTGAGAAGCCCCCGGGAGGTGCCCCGACGGAGAGCATCTCCGACGGAGCCCCCTCGGCACCGGTCCCCTGCGGCTGCGGCTGCGGCTGCGGCTGCGGGGACTGGGAGTTTCCCACAGTGCACTGCTCTGGGCGCCGCAGCCCGAGGGGGCGGGGCCGCATCGCCGCAGGCCCCGCCCCCTCGGCCTCCACGGCGCCCCCGGCTGGCGGGAACGCCGGGCCCGGCCCAGCTCCGCTGTGGGGCCCCAGGACGGTTGCGTTGGGGGGGGTGGGAAGGGGG…	NA
Osteosarcoma	SRR8691794	NC_001716_Human_herpesvirus_7	96.703	271	15226	TRINITY_DN225321_c0_g1_i1	TAGGGTTAGGGTTAGGGTTAGGGTTAGGGTTAGGGTTAGGGTTAGGGTTAGGGTTAGGGTTAGGGTTAGGGTTAGGGTTAGGGTTAGGGTTAGGGATAGGGTTCGGGTTAGGGCTAGGCATCGGGATCGGGCTAGGATGAGGTCTAGTGCTTGGGAAAGGGCTCGTGTTAGGGTTAGGGTCCGGCTTAGGGTTTGTTTTATGGTACGGCTTCCGCCGAGGTTTACGCTTCTGTTTAGGGTTTTGGTTTGGGTTAGGGTTAGGGTTAGGGTT	7e-28	Actinoplanes sp. N902-109
Osteosarcoma	SRR8691800	NC_000898_Human_herpesvirus_6B	94.737	444	41290	TRINITY_DN2452_c0_g1_i9	CGGTGCATGGAGCCTGCTTCTCCCTCGGCCTATGTCTCTGCCCCTCTCTCTCTCTCTCTGTGTGTGACTATCATAAATAAATAAAAATTTAAAAAAAAAAAAAAAAAAAAAAAGAAACCCCTTTTCCTTGATATTTATTGAAGTACAGTCAACACACAATGTGACAGTAGTTTCAGGGCTACAACTAGTGACTTGACAATTCTGTGCCTGACTTGACAATTCTGTGCCTTACTCAGCTCCCCCCACGAGAAGCAGCGTCACCGTCTGTCCCCTAACCCTAACCCTAACCCTAACCCTATACTCAGCTCCCTCCACAAGAAACGGCGTCACCATCTGTCCCCGTACATAGTTGTCACAACAGTACTGACTCTATTGCCAGGCTGTACTTTCTAAATTTCT…	3e-19	Branchiostoma floridae
	>
